# Supplementary material
Source: MDPI journal article supplement (https://www.mdpi.com/2071-1050/14/24/17038)
Supplement: s1 [file s1]

# Supplementary Materials

**Table S1.** Chemicals used for oxygen supply in fish ponds at Rajshahi district of Bangladesh.

| Serial No | Brand Name  | Active Ingredients                                                                                                                                                 | Dose                     | Producers                            | Price*                 |
|-----------|-------------|--------------------------------------------------------------------------------------------------------------------------------------------------------------------|--------------------------|--------------------------------------|------------------------|
| 1         | ACI-ox      | 2Na <sub>2</sub> CO <sub>3</sub> . 3H <sub>2</sub> O <sub>2</sub> 10%                                                                                              | 5–8g/decimal             | ACI Animal Health                    | 550/kg (6.11)          |
| 2         | Aqua oxygen | CuSO <sub>4</sub> , Al <sub>2</sub> (SO <sub>4</sub> ) <sub>3</sub> , KH <sub>2</sub> O, Co stic<br>thyo sulphate, sodium salt, NH <sub>4</sub> ,<br>Blue vitriole | 1packet/40–50mL<br>water | RnF Agro and Food<br>Industries Ltd. | 560/kg (6.22)          |
| 3         | Azla        | 2Na <sub>2</sub> CO <sub>3</sub> . 3H <sub>2</sub> O <sub>2</sub>                                                                                                  | 500–600g/acre            | Intefa                               | 680/kg (7.56)          |
| 4         | Best oxygen | 2Na <sub>2</sub> CO <sub>3</sub> . 3H <sub>2</sub> O <sub>2</sub>                                                                                                  | 250–500/acre             | Univet Ltd.                          | 580/kg (6.44)          |
| 5         | Oxy flow    | H <sub>2</sub> O <sub>2</sub> 10%                                                                                                                                  | 250–350g/acre            | Novartis (Bangladesh)<br>Ltd.        | 220/250g (2.44)        |
| 6         | Oxy-A       | 2Na <sub>2</sub> CO <sub>3</sub> . 3H <sub>2</sub> O <sub>2</sub>                                                                                                  | 300–400t/acre            | ACME Laboratories<br>Ltd.            | 235/250 tablets (2.61) |
| 7         | Oxycare     | 2Na <sub>2</sub> CO <sub>3</sub> . 3H <sub>2</sub> O <sub>2</sub>                                                                                                  | 500–600g/acre            | Corbel International<br>Ltd.         | 650/kg (7.22)          |
| 8         | Oxygreen    | 2Na <sub>2</sub> CO <sub>3</sub> . 3H <sub>2</sub> O <sub>2</sub>                                                                                                  | 250–300g/acre            | ZDHF Pharmaceuticals                 | 640/kg (7.11)          |
| 9         | Oxylife     | Oxygen precursors, Probiotics,<br>Detoxificants                                                                                                                    | 400g/acre                | Square Pharmaceuticals<br>Ltd.       | 210/250g (2.33)        |
| 10        | Oxymax      | H <sub>2</sub> O <sub>2</sub> 10%                                                                                                                                  | 250–500/acre             | Eon Animal Health<br>Products        | 720/kg (8.00)          |
| 11        | Oxymore     | 2Na <sub>2</sub> CO <sub>3</sub> . 3H <sub>2</sub> O <sub>2</sub>                                                                                                  | 250–500/acre             | SK+F                                 | 220/250g (2.44)        |
| 12        | Oxypro      | Calcium peroxide, <i>Bacillus subtilis</i> ,<br><i>B. megaterium</i>                                                                                               | 5–8g/acre                | PVS Impex Private<br>Limited         | 750/kg (8.33)          |
| 13        | Oxyren      | 2Na <sub>2</sub> CO <sub>3</sub> . 3H <sub>2</sub> O <sub>2</sub>                                                                                                  | 500g–1kg/acre            | Renata Limited                       | 600/kg (6.67)          |
| 14        | Zeoxy       | 2Na <sub>2</sub> CO <sub>3</sub> . 3H <sub>2</sub> O <sub>2</sub>                                                                                                  | 250–450g/acre            | GME Agro<br>Limited                  | 620/kg (6.89)          |

\* Values outside the parentheses shows the price in taka, and the value inside the parentheses indicates the price in USD (1 USD= 90 BDT).

**Table S2.** Chemicals used as growth promoter for cultured fish at Rajshahi district of Bangladesh.

| Serial no | Brand Name     | Active Ingredients                                                                                    | Dose                      | Producers                      | Price*           |
|-----------|----------------|-------------------------------------------------------------------------------------------------------|---------------------------|--------------------------------|------------------|
| 1         | Aqua boost     | Organic acid, β-glucan                                                                                | 500 g/ton feed            | Elanco Ltd.                    | 300/kg (3.33)    |
| 2         | Aqua growth    | Bitu glucon, oligosaccharide, essential<br>oils, organic acids and their salts<br>Vitamins, minerals, | 1g/kg feed                | GME Agro<br>Limited            | 700/kg (7.78)    |
| 3         | Aqua mix       | Aminoacids, prebiotics, yeast, and<br>antioxidant                                                     | 1g/kg feed                | Square<br>Pharmaceuticals Ltd. | 310/kg (3.44)    |
| 4         | Cevit aqua     | Vitamin C supplements                                                                                 | 0.5–2g/ton of water       | Square Pharmaceuticals<br>Ltd. | 90/100g (1.00)   |
| 5         | Cevit vet      | Vitamin C                                                                                             | 25 mg/kg feed             | Square Pharmaceuticals<br>Ltd. | 100/100 g (1.11) |
| 6         | DCP plus       | Dicalcium phosphate, magnesium<br>sulphate, NaCl, Trace elements                                      | 1kg/100kg feed            | Opsonin Pharma Ltd.            | 415/kg (4.61)    |
| 7         | Faster growth  | Vitamin, mineral. amino acid,<br>micronutrient, enzyme                                                | 10g/10kg feed             | Modern Herbal Agro<br>Pharma   | 650/kg (7.22)    |
| 8         | Fish vita plus | Vitamin, mineral and amino acid<br>supplement                                                         | 200–300 mL/100 kg<br>feed | Rals Agro Limited              | 250/kg (2.78)    |
| 9         | G Growth       | Inasitol, Mannitol (Manna Sugar),<br>Calcium Chloride,<br>Sodium Bi-carbonate etc.                    | 1–2g/2–3kg feed           | General Agrovat Ltd.           | 580/500g (6.44)  |
| 10        | Gel bind       | Protein, Fat, CHO, P, Ca, VitA, D3, E, K3                                                             | 8–10mL/kg feed            | Rims BD                        | 650/L (7.22)     |

|    |                |                                                                                                                                        |                   |                             |                  |
|----|----------------|----------------------------------------------------------------------------------------------------------------------------------------|-------------------|-----------------------------|------------------|
| 11 | GP fish        | Vitamin, mineral. amino acid, micronutrient, enzyme, omega-3 fatty acid, feed attractant, glucose                                      | 10g/kg feed       | ACI Animal Health           | 150/kg (1.67)    |
| 12 | Liquavit       | Vitamin A, D3, B1, B2, B6, E, immunostimulant                                                                                          | 5–10mL/kg feed    | ACI Animal Health           | 130/100mL (1.44) |
| 13 | Megavit aqua   | Vitamin, mineral and amino acid supplement                                                                                             | 100 g/100 kg feed | Elanco Ltd.                 | 380/kg (4.22)    |
| 14 | Panvit aqua    | Vitamin A, D3, B1, B2, B6, ascorbic acid, nicotinamide, Ca D pathothionate                                                             | 5–10mL/kg feed    | Square Pharmaceuticals Ltd. | 170/100mL (1.89) |
| 15 | Rena WS powder | Vitamin A, D3, B1, B2, B6, B12, K3, C, D, E, ascorbic acid, nicotinamide, D biotin, pathothionate acid, Folic acid                     | 1g/2.5–5L water   | Renata Ltd.                 | 270/100kg (3.00) |
| 16 | Renafish       | Vitamin A, D3, B1, B2, B6, B12, K3, C, D, E, nicotinamide, D biotin, pathothionate acid, Folic acid, Cu, Fe, Mn, Co, CaCO <sub>3</sub> | 1kg/ton feed      | Renata Ltd.                 | 300/kg (3.33)    |
| 17 | Safegut        | Probiotics, Vitamin & Enzymes                                                                                                          | 1–2g/2–3kg feed   | SK+F                        | 350/250g (3.89)  |
| 18 | Vitamix F aqua | Vitamin, mineral and amino acid                                                                                                        | 2.5 kg/ton feed   | ACME Laboratories Ltd.      | 330/kg (3.67)    |

\* Values outside the parentheses shows the price in taka, and the value inside the parentheses indicates the price in USD (1 USD= 90 BDT).

**Table S3.** Chemicals used to remove toxic gases from aquaculture ponds at Rajshahi district of Bangladesh.

| Serial no | Brand Name   | Active Ingredients                                                                                                                                           | Dose                | Producers                     | Price*            |
|-----------|--------------|--------------------------------------------------------------------------------------------------------------------------------------------------------------|---------------------|-------------------------------|-------------------|
| 1         | Ammonil      | Yucca plant extract, <i>Bacillus subtilis</i> , <i>Candida utilis</i>                                                                                        | 100–200 g/acre      | Novartis (Bangladesh) Ltd.    | 2800/kg (31.11)   |
| 2         | Aquakleen    | Brominated organic salts, Benzalkonium chloride (BKC) and Aminonitrogen with buffer                                                                          | 1 L/acre            | Square Pharmaceuticals Ltd.   | 475/L (5.28)      |
| 3         | Bioclean     | <i>Bacillus sp.</i> , <i>Lactobacillus sp.</i> , <i>Nitrobacter</i> , <i>Nitrosomonas</i>                                                                    | 1kg/hectare         | Organica Biotech Pvt. Ltd.    | 520/kg (5.78)     |
| 4         | Gasonex plus | Na-lorile ether sulphate                                                                                                                                     | 500–1000g/hectare   | Growel Formulations Pvt. Ltd. | 1200/500g (13.33) |
| 5         | Gastrap      | Lactic acid <i>Bacillus sp.</i> , <i>Bacillus subtilis</i> , Cellulase, Hemicellulase, amylase, Cellulase, Pectinase, Protease, Xylanase, $\beta$ -Glucanase | 200 mg/acre         | Square Pharmaceuticals Ltd.   | 3000/kg (33.33)   |
| 6         | Growzyme     | $\alpha$ -Amylase, <i>Lactobacillus acidophilus</i> , <i>Lactobacillus sporogenes</i> , <i>Saccharomyces cerevisiae</i>                                      | 500g–1.5kg/ton feed | Century Agro Ltd.             | 2500/kg (27.78)   |
| 7         | Pondkleen    | An extract of Yucca schidigera plants; Contain Saponins & Glycocomponents                                                                                    | 100mL/33 decimal    | ACI Animal Health             | 320/100mL (3.56)  |
| 8         | Tara         | Yucca plant extract                                                                                                                                          | 50–100mL /33decimal | Intefa                        | 325/100mL (3.61)  |

\* Values outside the parentheses shows the price in taka, and the value inside the parentheses indicates the price in USD (1 USD= 90 BDT).

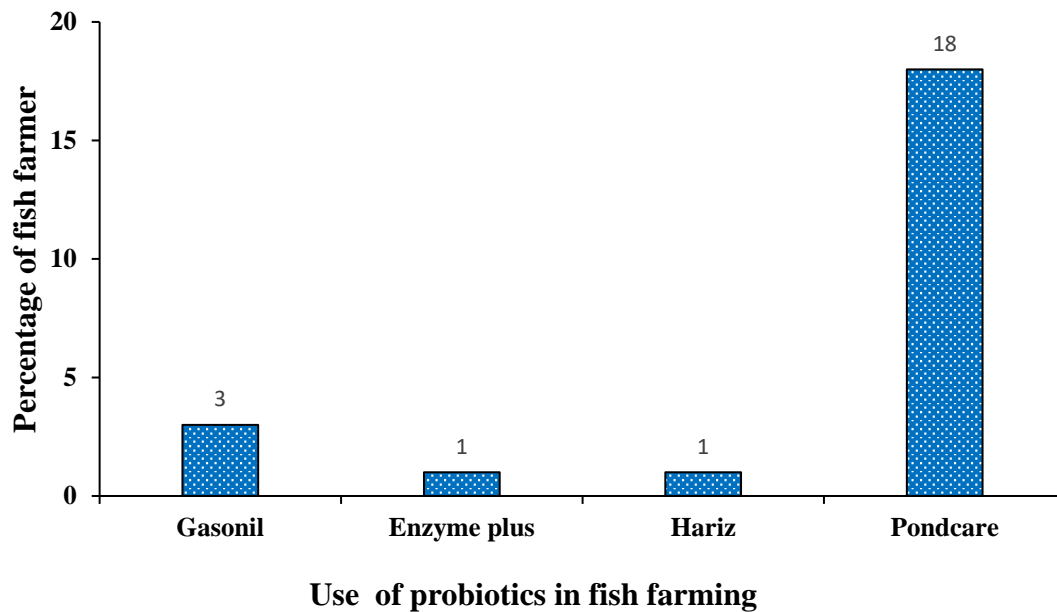

**Figure S1.** Percentage of fish farmers (n = 100) used probiotics in fish farming at Rajshahi district of Bangladesh.

## Questionnaire

ID: No.....

**Questionnaire survey to identify the antibiotics, pesticides and chemicals used in finfish aquaculture**  
Questionnaire was designed to conduct survey and get relevant information about antibiotics, pesticides and other chemicals used in freshwater aquaculture in Rajshahi area, Bangladesh. Fish farmers are the target of this survey. **The information will be used solely for the research purpose with confidentiality.**

### A.Part I: Consent of the fish farmer

Do you agree to participate this survey? if you agree with this survey, we will proceed the survey with you.

a. Agree

b. Disagree

1. Name of the interviewee:
2. Name of the household head:
3. Address: Village.....Union/Ward.....  
Upazila..... District.....
4. Religion: Muslim/Hindu/Christian/Others (specify).....
5. Sex: Male/Female
6. Age:
7. Marital Status: Married/Single/ Widowed/others
8. Educational Level: Illiterate/can read/Primary/Secondary/Higher secondary/graduate/post graduate/PhD

9. **Principle Occupation:** Fish culture/Fishing/ Agriculture /Daily labour/Shop keeping/Driving/Business/Job/Others (specify).....

## B. Part II: Information about chemical use in fish farming

10. Do you use any kind of chemicals/drugs in your culture system?

- ☐ Yes
- ☐ No

If your answer is **YES**, please provide the following information.....

11. From who have you inspired of using chemicals/drugs in your aquaculture farms

- ☐ Adjacent farmers
- ☐ Friends/relatives
- ☐ Upazilla Fisheries Officer/ Fisheries technician
- ☐ Educational institute
- ☐ Representative from pharmaceuticals company
- ☐ Media
- ☐ Other:

12. What are the diseases are you having in your aquaculture farm

- ☐ Bacterial diseases
- ☐ Viral diseases
- ☐ Fungal diseases
- ☐ Parasitic infestation
- ☐ Other:

13. Do you use antibiotics and pesticides in your culture system

- ☐ Yes
- ☐ No

If your answer is YES, why do you use antibiotics and pesticides in your farming system (please mention)

- Antibiotics:
- Pesticides:

14. Do you face any problems regarding using aqua-chemicals and drugs

- Yes
- No

If your answer is Yes, please mention what are the problem do you face to use chemicals/drugs in your farm

- Lack of knowledge about the use of chemicals/drugs
- Lack of knowledge about the effective doses of the chemicals/drugs
- Lack of disease diagnostic tools
- Lack of knowledge of safety issues in the use of hazardous chemicals
- Insufficient supply/ unavailability of the chemicals/drugs
- High prices of the chemicals/drugs
- Other:

**15. Chemicals used for pond preparation and water quality management:**

| Brand (Trade) Name of chemicals | Active ingredients | Host fish species | Symptoms | Dose | Price | Purpose of use | remarks |
|---------------------------------|--------------------|-------------------|----------|------|-------|----------------|---------|
| Geotox                          |                    |                   |          |      |       |                |         |
| Zeolite gold                    |                    |                   |          |      |       |                |         |
| JV zeolite                      |                    |                   |          |      |       |                |         |
| Hunter                          |                    |                   |          |      |       |                |         |
| Green zeolite                   |                    |                   |          |      |       |                |         |
| Pontox plus                     |                    |                   |          |      |       |                |         |
| Geolite                         |                    |                   |          |      |       |                |         |
| Rotenone                        |                    |                   |          |      |       |                |         |
| Blue vitriol                    |                    |                   |          |      |       |                |         |
| Cal zeolite                     |                    |                   |          |      |       |                |         |
| Matrix                          |                    |                   |          |      |       |                |         |
| Benzo                           |                    |                   |          |      |       |                |         |
| TSP                             |                    |                   |          |      |       |                |         |
| Urea                            |                    |                   |          |      |       |                |         |
| Yucca                           |                    |                   |          |      |       |                |         |
| Zeocare                         |                    |                   |          |      |       |                |         |
| Mega zeo                        |                    |                   |          |      |       |                |         |
| Mega zeo plus                   |                    |                   |          |      |       |                |         |
| Lime                            |                    |                   |          |      |       |                |         |
| Agriculture lime                |                    |                   |          |      |       |                |         |
| Bis zeolite                     |                    |                   |          |      |       |                |         |

|                |  |  |  |  |  |  |  |
|----------------|--|--|--|--|--|--|--|
| Super zeolite  |  |  |  |  |  |  |  |
| Bio-Tuff       |  |  |  |  |  |  |  |
| Well zeolite   |  |  |  |  |  |  |  |
| Bio aqua       |  |  |  |  |  |  |  |
| Aquazet        |  |  |  |  |  |  |  |
| <b>Others:</b> |  |  |  |  |  |  |  |
|                |  |  |  |  |  |  |  |
|                |  |  |  |  |  |  |  |
|                |  |  |  |  |  |  |  |

#### 16. Chemicals used as disinfectant:

| Brand (Trade)<br>Name of chemicals |  | Host fish<br>species | Symptoms | Dose | Price | Purpose<br>of use | remarks |
|------------------------------------|--|----------------------|----------|------|-------|-------------------|---------|
| EDTA (Sodium thiosulfate)          |  |                      |          |      |       |                   |         |
| Bleaching powder                   |  |                      |          |      |       |                   |         |
| Timsen                             |  |                      |          |      |       |                   |         |
| Emsen                              |  |                      |          |      |       |                   |         |
| Aquakleen                          |  |                      |          |      |       |                   |         |
| Micronil                           |  |                      |          |      |       |                   |         |
| Germnil                            |  |                      |          |      |       |                   |         |
| Fam-30                             |  |                      |          |      |       |                   |         |
| GPC-8                              |  |                      |          |      |       |                   |         |
| Eon CTC                            |  |                      |          |      |       |                   |         |
| Pathocide                          |  |                      |          |      |       |                   |         |
| Water clear                        |  |                      |          |      |       |                   |         |
| Miras                              |  |                      |          |      |       |                   |         |
| Pathonil                           |  |                      |          |      |       |                   |         |
| Polgard                            |  |                      |          |      |       |                   |         |
| Potash                             |  |                      |          |      |       |                   |         |
| Salt                               |  |                      |          |      |       |                   |         |
| Omicide                            |  |                      |          |      |       |                   |         |
| Lenocide                           |  |                      |          |      |       |                   |         |
| Microdinelodine<br>20%             |  |                      |          |      |       |                   |         |
| Virex                              |  |                      |          |      |       |                   |         |
| Virocid                            |  |                      |          |      |       |                   |         |
| Formalin                           |  |                      |          |      |       |                   |         |
| BKC<br>(benzalkonium<br>chloride)  |  |                      |          |      |       |                   |         |
| Efinol                             |  |                      |          |      |       |                   |         |

|                |  |  |  |  |  |  |  |
|----------------|--|--|--|--|--|--|--|
| <b>Others:</b> |  |  |  |  |  |  |  |
|                |  |  |  |  |  |  |  |
|                |  |  |  |  |  |  |  |
|                |  |  |  |  |  |  |  |
|                |  |  |  |  |  |  |  |
|                |  |  |  |  |  |  |  |
|                |  |  |  |  |  |  |  |
|                |  |  |  |  |  |  |  |

**17. Chemicals used for oxygen supply:**

| Brand name       | Active ingredients | Dose | Producers | Price |
|------------------|--------------------|------|-----------|-------|
| Oxy flow         |                    |      |           |       |
| Oximax           |                    |      |           |       |
| O2- Marine       |                    |      |           |       |
| Oxy-A            |                    |      |           |       |
| Oxycare          |                    |      |           |       |
| Oxygreen         |                    |      |           |       |
| Bio care         |                    |      |           |       |
| Bio- Ox          |                    |      |           |       |
| Oxylife          |                    |      |           |       |
| Oxymax           |                    |      |           |       |
| Oxy plus         |                    |      |           |       |
| Oxymore          |                    |      |           |       |
| Oxypro           |                    |      |           |       |
| Oxyren           |                    |      |           |       |
| Zeoxy            |                    |      |           |       |
| Oxygen plus      |                    |      |           |       |
| Oxymore          |                    |      |           |       |
| Quick oxygen     |                    |      |           |       |
| O-Plus           |                    |      |           |       |
| Oxygrow          |                    |      |           |       |
| Oxysun           |                    |      |           |       |
| Fish care powder |                    |      |           |       |
| Fish curepas     |                    |      |           |       |
| Best oxygen      |                    |      |           |       |
| Oxy-gold         |                    |      |           |       |
| <b>Others:</b>   |                    |      |           |       |
|                  |                    |      |           |       |
|                  |                    |      |           |       |
|                  |                    |      |           |       |
|                  |                    |      |           |       |

**18. Chemicals used as toxic gas removal**

| Brand name     | Active ingredients | Dose | Producers | Price |
|----------------|--------------------|------|-----------|-------|
| Aquakleen      |                    |      |           |       |
| Ammonil        |                    |      |           |       |
| Bioclean       |                    |      |           |       |
| Gastrap        |                    |      |           |       |
| Gasonex plus   |                    |      |           |       |
| Growzyme       |                    |      |           |       |
| Pondkleen      |                    |      |           |       |
| Tara           |                    |      |           |       |
| <b>Others:</b> |                    |      |           |       |
|                |                    |      |           |       |
|                |                    |      |           |       |
|                |                    |      |           |       |
|                |                    |      |           |       |



**19. Pesticides and other chemicals used for disease treatment:**

| Brand name          | Active ingredients | Dose | Producers | Price | Purpose of Use |
|---------------------|--------------------|------|-----------|-------|----------------|
| Melathion           |                    |      |           |       |                |
| Sumithion           |                    |      |           |       |                |
| Protacide           |                    |      |           |       |                |
| Deletix             |                    |      |           |       |                |
| Bicothrin           |                    |      |           |       |                |
| Yucca plant extract |                    |      |           |       |                |
| Rotenone            |                    |      |           |       |                |
| Methylene blue      |                    |      |           |       |                |
| Malachite green     |                    |      |           |       |                |
| Timsen              |                    |      |           |       |                |
| Acimec-1%           |                    |      |           |       |                |
| Angreb              |                    |      |           |       |                |
| Potash              |                    |      |           |       |                |
| Eco-solution        |                    |      |           |       |                |
| Lime                |                    |      |           |       |                |
| Corolux             |                    |      |           |       |                |
| Cyperin             |                    |      |           |       |                |
| Formalin            |                    |      |           |       |                |
| Fifenon             |                    |      |           |       |                |
| Fishmethrin         |                    |      |           |       |                |
| Argulex             |                    |      |           |       |                |
| OSSI-C              |                    |      |           |       |                |
| Ripcord             |                    |      |           |       |                |
| Salt                |                    |      |           |       |                |

|                |  |  |  |  |  |
|----------------|--|--|--|--|--|
| Albez          |  |  |  |  |  |
| Spa            |  |  |  |  |  |
| <b>Others:</b> |  |  |  |  |  |
|                |  |  |  |  |  |
|                |  |  |  |  |  |
|                |  |  |  |  |  |
|                |  |  |  |  |  |
|                |  |  |  |  |  |
|                |  |  |  |  |  |

**20. Antibiotics for disease treatment:**

| Brand name          | Active ingredients | Dose | Host fish species | Symptoms | Producers | Price |
|---------------------|--------------------|------|-------------------|----------|-----------|-------|
| Oxysentin 20%       |                    |      |                   |          |           |       |
| Chlorsteclin        |                    |      |                   |          |           |       |
| Renamycin           |                    |      |                   |          |           |       |
| Cipro-A vet         |                    |      |                   |          |           |       |
| Fish cur            |                    |      |                   |          |           |       |
| Ranamox             |                    |      |                   |          |           |       |
| Ciproflox           |                    |      |                   |          |           |       |
| Acimox (vet) powder |                    |      |                   |          |           |       |
| Oxy-D-vet           |                    |      |                   |          |           |       |
| Renaflox            |                    |      |                   |          |           |       |
| Renatrim            |                    |      |                   |          |           |       |
| Orgacyline 15%      |                    |      |                   |          |           |       |
| Orgamycin 15%       |                    |      |                   |          |           |       |
| Bacitab             |                    |      |                   |          |           |       |
| Contrim vet Bolus   |                    |      |                   |          |           |       |

|                     |  |  |  |  |  |  |
|---------------------|--|--|--|--|--|--|
| Otetravet powder 50 |  |  |  |  |  |  |
| Sulfatrim           |  |  |  |  |  |  |
| Oxin WS             |  |  |  |  |  |  |
| Cotrim- Vet         |  |  |  |  |  |  |
| Sulphatrim          |  |  |  |  |  |  |
| <b>Others:</b>      |  |  |  |  |  |  |
|                     |  |  |  |  |  |  |
|                     |  |  |  |  |  |  |

**21. Chemicals used as growth promoter:**

| Brand name        | Active ingredients | Dose | Producers | Price |
|-------------------|--------------------|------|-----------|-------|
| Acimix super-fish |                    |      |           |       |
| AC mix super-fish |                    |      |           |       |
| AQ cell           |                    |      |           |       |
| AQ grow-G         |                    |      |           |       |
| Aqua growth       |                    |      |           |       |
| Aqua mix          |                    |      |           |       |
| Cevit aqua        |                    |      |           |       |
| DCP plus          |                    |      |           |       |
| G Growth          |                    |      |           |       |
| GP fish           |                    |      |           |       |
| Liquavit          |                    |      |           |       |
| Panvit aqua       |                    |      |           |       |
| Rena WS powder    |                    |      |           |       |
| Renafish          |                    |      |           |       |
| Safegut           |                    |      |           |       |

|                              |  |  |  |  |
|------------------------------|--|--|--|--|
| AQ grow-L                    |  |  |  |  |
| AQ grow-P                    |  |  |  |  |
| Aqua boost                   |  |  |  |  |
| Aqua savor                   |  |  |  |  |
| Auqamin                      |  |  |  |  |
| Ayumin<br>Powder             |  |  |  |  |
| Calfostonic<br>powder        |  |  |  |  |
| Cevit vet                    |  |  |  |  |
| Diamond fish                 |  |  |  |  |
| Diaginix aqua                |  |  |  |  |
| Fibisoel                     |  |  |  |  |
| Fish vita plus               |  |  |  |  |
| Faster growth                |  |  |  |  |
| Growmax                      |  |  |  |  |
| Machalmen                    |  |  |  |  |
| Megavit Aqua                 |  |  |  |  |
| Nature aqua<br>GP            |  |  |  |  |
| Nature's gift<br>liquid gold |  |  |  |  |
| Orgavit aqua                 |  |  |  |  |
| Vitamin<br>premix            |  |  |  |  |
| Vitamin F<br>aqua            |  |  |  |  |
| <b>Others:</b>               |  |  |  |  |
|                              |  |  |  |  |
|                              |  |  |  |  |
|                              |  |  |  |  |

22. Probiotic used is fish culture

| Brand name     | Active ingredients | Dose | Producers | Price |
|----------------|--------------------|------|-----------|-------|
| Pondcare       |                    |      |           |       |
| Aqua gold      |                    |      |           |       |
| Aqua Photo     |                    |      |           |       |
| Bio-Zyme       |                    |      |           |       |
| C-150          |                    |      |           |       |
| Eco manine     |                    |      |           |       |
| Gasonil        |                    |      |           |       |
| Ecomax         |                    |      |           |       |
| Golden Bac     |                    |      |           |       |
| Enzyme plus    |                    |      |           |       |
| Super Biotic   |                    |      |           |       |
| Prococn -PH    |                    |      |           |       |
| PH fixer       |                    |      |           |       |
| Mutagen        |                    |      |           |       |
| Super PS       |                    |      |           |       |
| Zymetine       |                    |      |           |       |
| Zymetine       |                    |      |           |       |
| <b>Others:</b> |                    |      |           |       |
|                |                    |      |           |       |
|                |                    |      |           |       |
|                |                    |      |           |       |

**23. Recently introduced aqua-chemicals in aquaculture of the study area.**

| Chemicals | Active ingredients | Purpose of use | Producer |
|-----------|--------------------|----------------|----------|
|           |                    |                |          |
|           |                    |                |          |
|           |                    |                |          |
|           |                    |                |          |
|           |                    |                |          |
|           |                    |                |          |
|           |                    |                |          |
|           |                    |                |          |
|           |                    |                |          |
|           |                    |                |          |

Signature:

Mobile Number:
